# Supplementary material
Source: PubMed Central journal article supplement (PMC3057847)

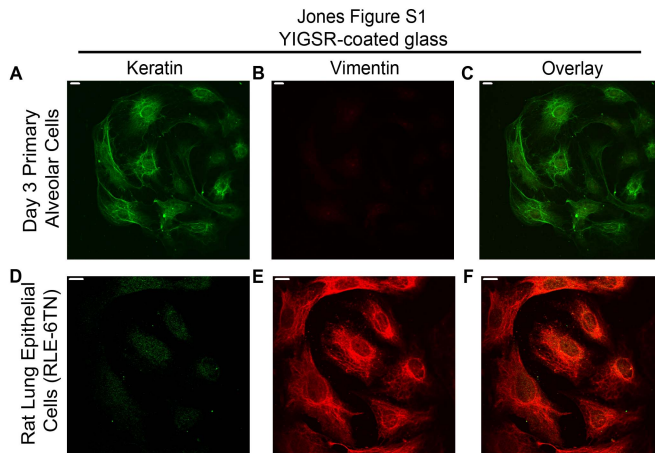

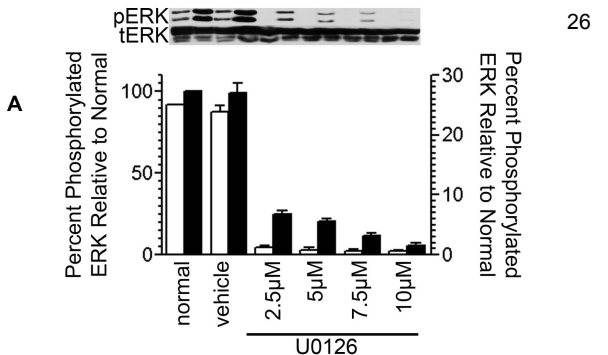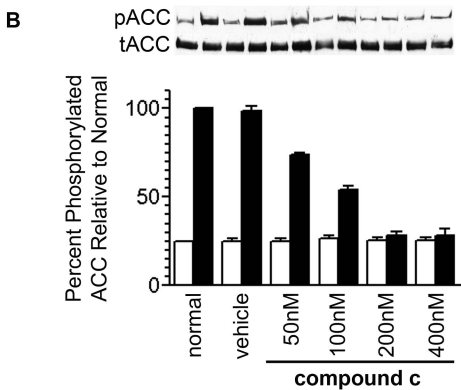

YIGSR-coated glass

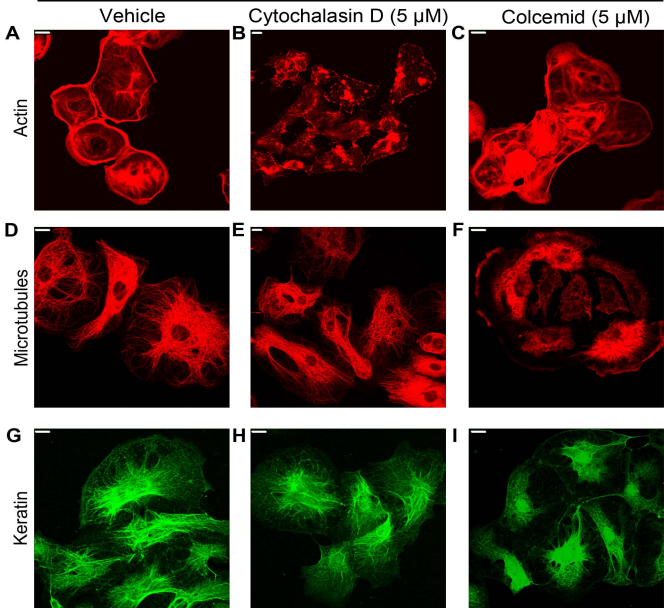

**A**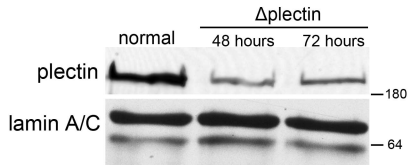**B**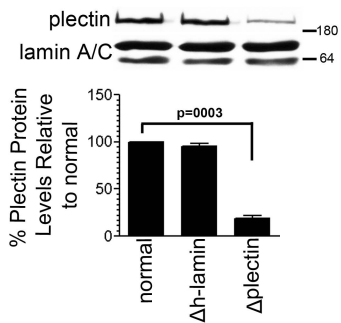

Supplement: supp_M110.178988_jbc.M110.178988-1.pdf [file supp_M110.178988_jbc.M110.178988-1.pdf]
